# Supplementary material
Source: publisher site journal article supplement (https://www.dovepress.com/article/370788)

**Table S1. Additional baseline characteristics between GN and non-GN sepsis.**

| <b>Characteristic</b>                                      | <b>GN sepsis<br/>n = 21</b> | <b>Non-GN sepsis<br/>n = 24</b> | <b>P value</b> |
|------------------------------------------------------------|-----------------------------|---------------------------------|----------------|
| <b>IL-10 pg/mL at T<sub>0</sub></b>                        |                             |                                 |                |
| Mean (SD)                                                  | 798.19 (2306.98)            | 258.24 (928.6)                  | 0.26           |
| Median (IQR)                                               | 36.60 (0.00-9713.78)        | 9.93 (0.00-4534.95)             |                |
| Geometric mean (SD at log scale) for measurable expression | 86.72 (2.43)                | 21.92 (2.44)                    |                |
| Measurable Expression                                      | 16                          | 18                              | 0.99           |
| Unmeasurable expression                                    | 5                           | 6                               |                |
| <b>Vasopressor, max number (%)</b>                         |                             |                                 |                |
| 0                                                          | 3 (14.29)                   | 6 (25.00)                       | 0.81           |
| 1                                                          | 10 (47.62)                  | 5 (20.83)                       |                |
| 2                                                          | 3 (14.29)                   | 6 (25.00)                       |                |
| >=3                                                        | 5 (23.81)                   | 7 (29.17)                       |                |
| <b>Vasopressor use</b>                                     |                             |                                 |                |
| Yes (%)                                                    | 18 (85.71)                  | 18 (75.00%)                     | 0.38           |
| No (%)                                                     | 3 (14.29)                   | 6 (25.00%)                      |                |
| Among Yes: median number (IQR)                             | 1 (1-6)                     | 2 (1-5)                         | 0.98           |
| Among Yes: total time median (IQR)                         | 29.62 (1.00-136.50)         | 45.12 (5.50 -279.75)            |                |
| <b>Invasive ventilation</b>                                |                             |                                 |                |
| Yes (%)                                                    | 10 (47.62)                  | 14 (58.33)                      | 0.49           |
| No (%)                                                     | 11 (52.38)                  | 10 (41.67)                      |                |
| Among Yes: median hours (IQR)                              | 61.00 (10-1074.50)          | 115.25 (6.75-223.25)            | 0.57           |
| <b>Intensive care unit length of stay</b>                  |                             |                                 |                |
| median days (IQR)                                          | 3 (2-80)                    | 5 (1-37)                        | 0.81           |
| <b>Admission length of stay</b>                            |                             |                                 |                |
| median days (IQR)                                          | 12 (2-132)                  | 9 (2-45)                        | 0.93           |

Abbreviations: SD = standard deviation, IQR = interquartile range, T<sub>0</sub> = 0 hour, clinical recognition of sepsis, IL-10 = Interleukin-10, **Bold** designate headings.

**Figure S1.** Resistin concentration and infectious etiology. A) Resistin concentration (ng/mL) in ICU patients with sepsis at T<sub>0</sub>, T<sub>6</sub>, and T<sub>24</sub>, respectively, with non-septic volunteers in blue. B) Pie chart of infectious organism determined as cause of sepsis. C) Resistin concentration according to gram-negative versus survivor and non-survivor status. ns: not significant. \*: Mortality within 60 days

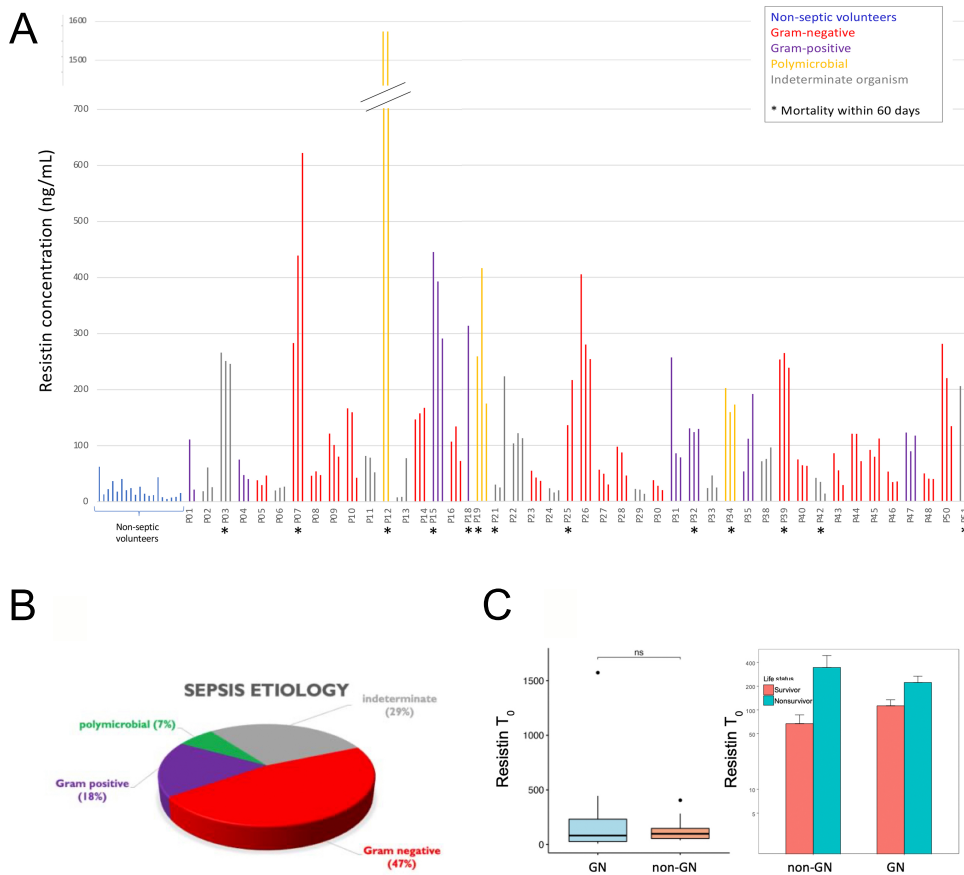

Supplement: Supplementary file 1 [file get_supplementary_file.php]
